# Supplementary material for: Beyond mechanochromism: Programmable multimodal actuation in cholesteric liquid crystal elastomer hollow fibers
Source: Research Square preprint supplement (doi:10.21203/rs.3.rs-7864586/v1), 2025-11-06
Supplement: Supplementary file 1 [file afad6525777d93f9c8b3c0ad.pdf]

Supporting Information

**Beyond mechanochromism: Programmable multimodal actuation in cholesteric liquid crystal elastomer hollow fibers**

*Jiazhe Ma,<sup>[a]</sup> John S. Biggins,<sup>\*[c]</sup> Fan Feng<sup>\*[d]</sup> and Zhongqiang Yang<sup>\*[a,b]</sup>*

[a] Key Lab of Organic Optoelectronics and Molecular Engineering of Ministry of Education, Department of Chemistry, Tsinghua University, Beijing 100084, P. R. China

[b] Laboratory of Flexible Electronics Technology, Tsinghua University, Beijing 100084, P. R. China

[c] Department of Engineering, University of Cambridge, Trumpington St., Cambridge CB2 1PZ, UK

[d] Department of Mechanics and Engineering Science, College of Engineering, Peking University, Beijing 100871, P. R. China

E-mail: [zyang@tsinghua.edu.cn](mailto:zyang@tsinghua.edu.cn); [fanfeng@pku.edu.cn](mailto:fanfeng@pku.edu.cn); [jsb56@cam.ac.uk](mailto:jsb56@cam.ac.uk)

18 **Supporting Figures:**

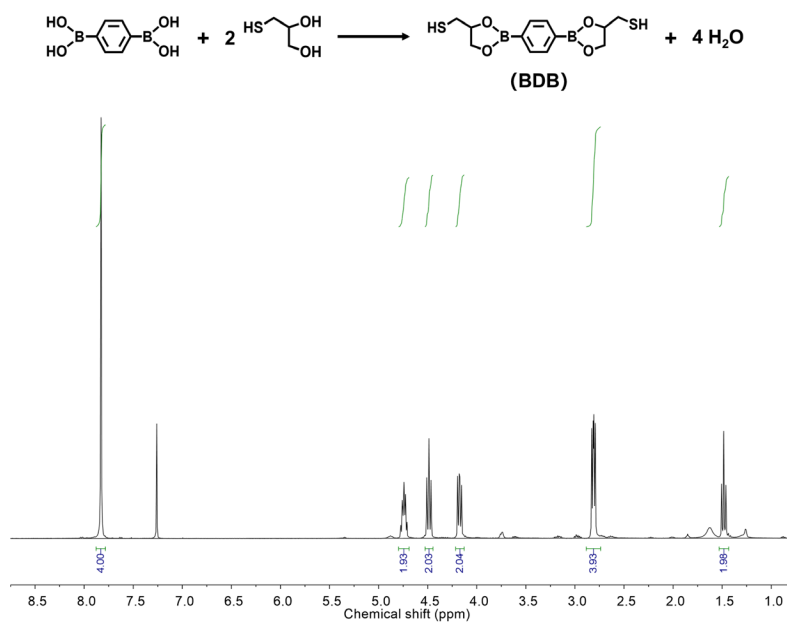

19  
20 **Figure S1.** Reaction scheme and  $^1\text{H}$  NMR spectrum of BDB.

21  
22  $^1\text{H}$  NMR (400 MHz,  $\text{CDCl}_3$ ):  $\delta$  7.83 (s, 4H), 4.80 – 4.69 (m, 2H), 4.49 (t,  $J = 8.6$  Hz, 2H), 4.18  
23 (dd,  $J = 9.1, 6.6$  Hz, 2H), 2.81 (dd,  $J = 8.6, 5.4$  Hz, 4H), 1.48 (t,  $J = 8.7$  Hz, 2H).

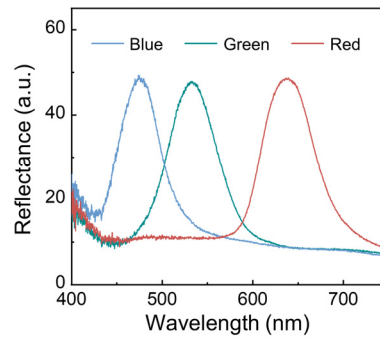

25

26

**Figure S2.** Reflectance spectra of three CLCE hollow fibers that show red, green and blue.

27

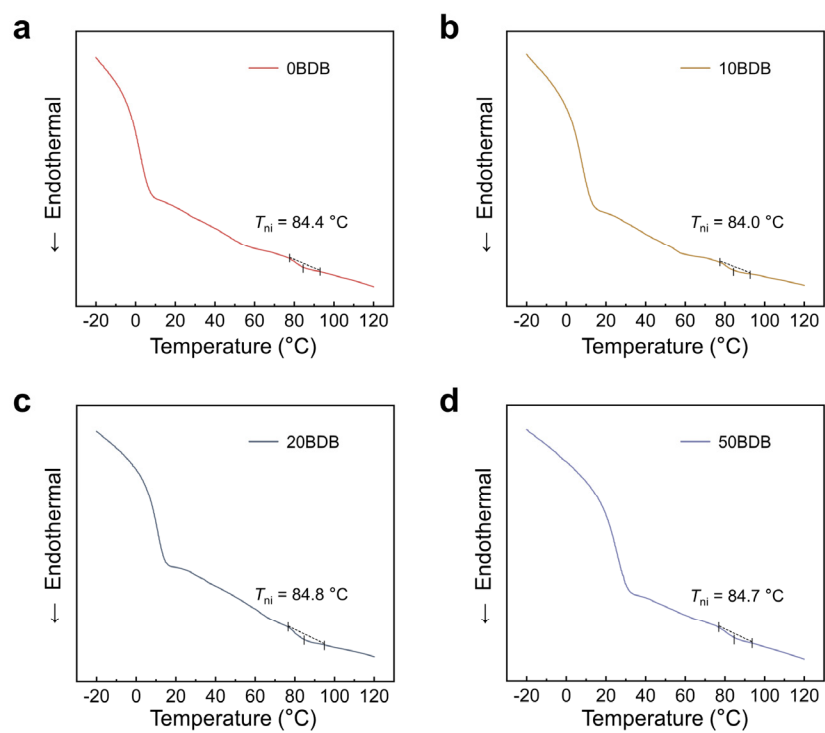

**Figure S3.** Differential scanning calorimetry characterization of CLCE hollow fibers with different molar ratios of BDB.

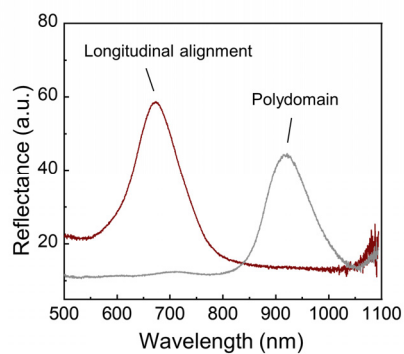

**Figure S4.** Reflectance spectra of the longitudinally aligned CLCE hollow fiber before and after programming.

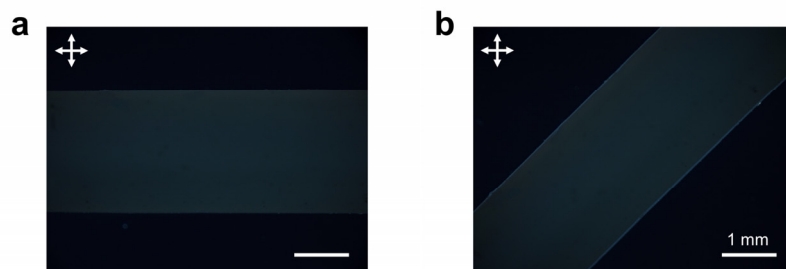

**Figure S5.** POM of the longitudinally aligned CLCE hollow fiber before programming.

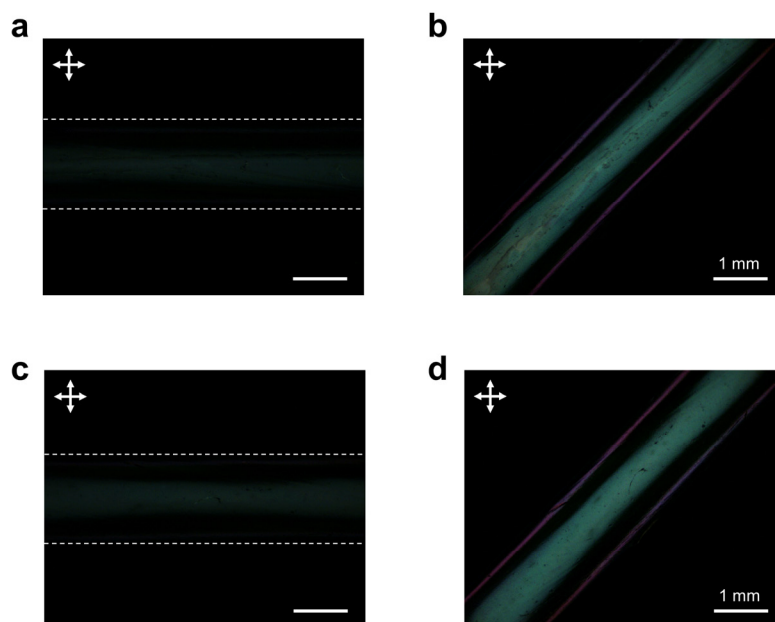

**Figure S6.** POM images of the twisted CLCE hollow fibers with (a and b)  $9^{\circ} \text{ mm}^{-1}$  and (c and d)  $18^{\circ} \text{ mm}^{-1}$  right-handed twist, respectively.

(i) 9-Left:

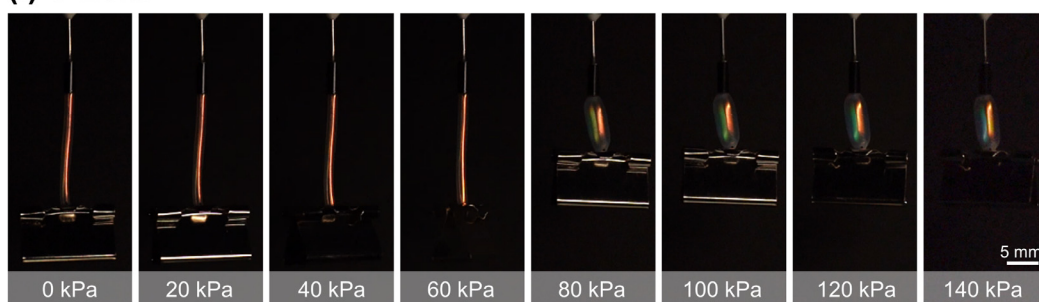

(ii) 9-Right:

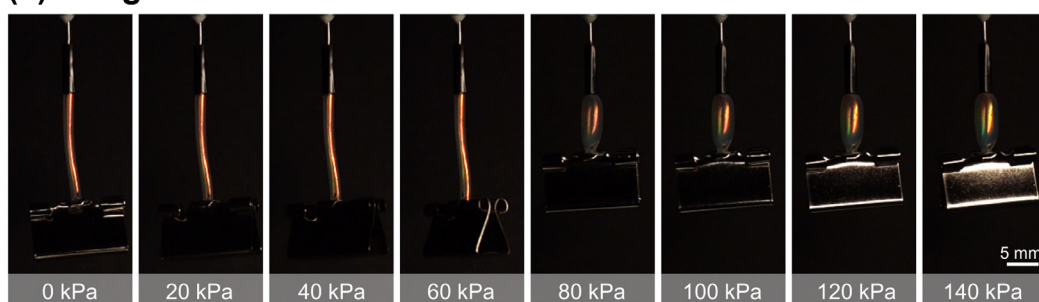

(iii) 18-Right:

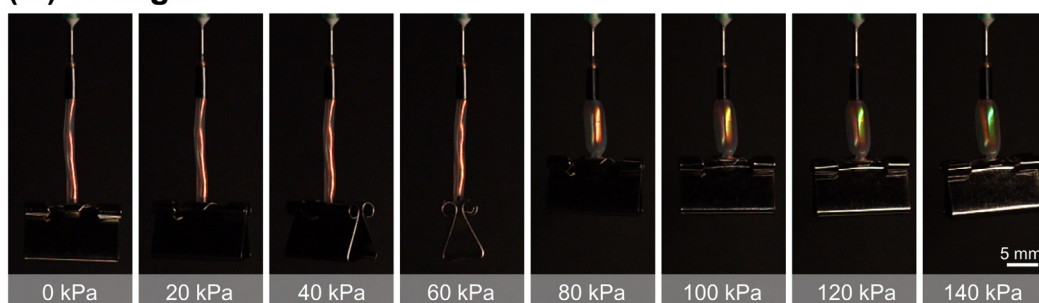

**Figure S7.** Pneumatic response of the twisted CLCE hollow fibers with (a)  $9^\circ \text{ mm}^{-1}$  left-handed twist, (b)  $9^\circ \text{ mm}^{-1}$  right-handed twist, and (c)  $18^\circ \text{ mm}^{-1}$  right-handed twist, respectively.



48 **Supporting Movies:**

49 **Movie S1. Pneumatic response of a polydomain CLCE hollow fiber.** The air pressure was  
50 set directly to 100 kPa, and the valve was opened for rapid inflation.

51 **Movie S2. Pneumatic response of a longitudinally aligned CLCE hollow fiber.** The air  
52 pressure was first set to 80 kPa, and the valve was opened to begin inflation. Once the shape  
53 and color of the fiber no longer changed, the air pressure was then increased to 120 kPa for  
54 further inflation.

55 **Movie S3. Pneumatic response of a circumferentially aligned CLCE hollow fiber.** The air  
56 pressure was set directly to 200 kPa, and the valve was opened for rapid inflation.

57 **Movie S4. Pneumatic response of a CLCE hollow fiber with  $18^\circ \text{ mm}^{-1}$  left-handed twist.**  
58 The air pressure was first set to 80 kPa, and the valve was opened to begin inflation. Once the  
59 shape and color of the fiber no longer changed, the air pressure was then increased to 140 kPa  
60 for further inflation.
